# Supplementary material for: In situ capturing site-to-site reactive species in CO2-laser-patterned high-entropy alloy nanoflowers for robust alkaline seawater electrolysis
Source: Royal Society of Chemistry journal article supplement (doi:10.1039/d4ta02120g), 2024-01-01
Supplement: d4ta02120g1.pdf [file d4ta02120g1.pdf]

**Supplementary Information**

**for**

**In-situ Capturing Site-to-Site Reactive Species in CO<sub>2</sub>-Laser Patterned High-Entropy Alloy Nanoflowers for Robust Alkaline Seawater Electrolysis**

Chae Eun Park<sup>a,†</sup>, Gyoung Hwa Jeong<sup>b,†</sup>, Velusamy Maheskumar<sup>a,†</sup>, Jayaraman Theerthagiri<sup>a</sup>,  
Myong Yong Choi<sup>a,b,c\*</sup>

<sup>a</sup> Department of Chemistry (BK21 FOUR), Research Institute of Natural Sciences, Gyeongsang National University, Jinju, 52828, Republic of Korea

<sup>b</sup> Research Institute for Green Energy Convergence Technology, Gyeongsang National University, Jinju, 52828, Republic of Korea

<sup>c</sup> Core-Facility Center for Photochemistry & Nanomaterials, Gyeongsang National University, Jinju, 52828, Republic of Korea

\* E-mail address of corresponding author: [mychoi@gnu.ac.kr](mailto:mychoi@gnu.ac.kr) (Myong Yong Choi)

† These authors contributed equally to this work

## **Materials**

Hydrogen gold (III) chloride ( $\text{HAuCl}_4 \cdot 3\text{H}_2\text{O}$ , 99.9%), Ruthenium (III) chloride hydrate ( $\text{RuCl}_3 \cdot x\text{H}_2\text{O}$ , 98%), hydrogen gold (III) chloride ( $\text{HAuCl}_4 \cdot 3\text{H}_2\text{O}$ , 99.9%), potassium palladium (II) chloride ( $\text{K}_2\text{PdCl}_4$ , 98%), and potassium platinum (II) chloride ( $\text{K}_2\text{PtCl}_4$ , 98%) were supplied by Sigma-Aldrich, USA. Iridium (III) chloride hydrate ( $\text{IrCl}_3 \cdot x\text{H}_2\text{O}$ , 99.9%) was obtained from STREM chemicals, USA. Hydrochloric acid (HCl, 35%), ethanol (high-performance liquid chromatography grade, 99.5%), and potassium hydroxide (KOH, extra pure flakes, 93%) were purchased from Daejung Chemicals, South Korea. All chemicals were used as-received without further purification.

## **Characterization techniques**

Surface morphology and elemental compositional properties of the synthesized HEAs were assessed via high-resolution transmission electron microscopy (HR-TEM) using a FEI Talos F200X TEM (Thermo Fisher Scientific, USA) instrument under an operating voltage of 200 kV. The elemental mapping images were recorded using a Spectra Ultra-X EDX detector attached with HRTEM (Thermo Fisher Scientific, USA) under an operating voltage of 80 kV. Field-emission scanning electron microscope (FESEM Apreo S, Thermo Fisher) is used record surface structures. Powder X-ray diffraction (XRD) patterns were recorded on a Bruker D8 Advance A25 diffractometer (Germany) with Cu-K $\alpha$  radiation ( $\lambda = 0.1541$  nm) at a scan rate of 5°/min. UV-visible absorption spectra were collected from a UV-visible spectroscopy (GENESYS 10S, Thermo Fisher Scientific). The quantitative analysis of the elemental composition of the materials was performed in an inductively coupled plasma optical emission spectrometer (ICP-OES, PerkinElmer, Optima 8300DV). Raman spectra were recorded in

Raman imaging microscope with a 532 nm continuous laser (DXR2xi, Thermo Scientific). The elemental state and binding energies of the samples were studied using X-ray photoelectron spectroscopy (XPS, Thermo Scientific Nexsa G2).

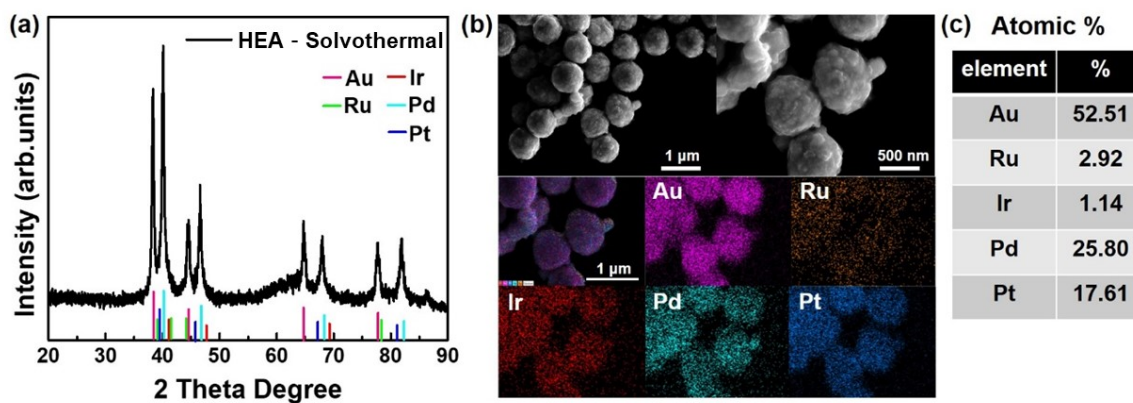

**Fig. S1** (a) XRD, (b) FE-SEM images with elemental mapping, and (c) ICP-OES of HEA synthesized via solvothermal process.

## HEA-30

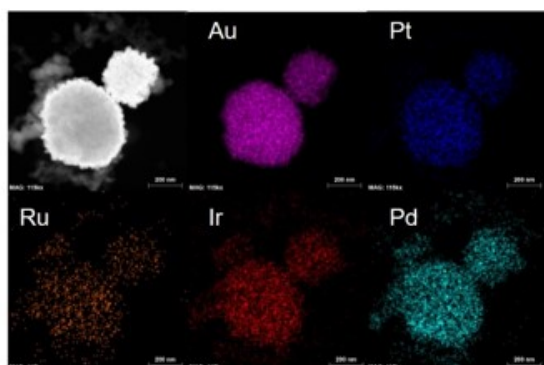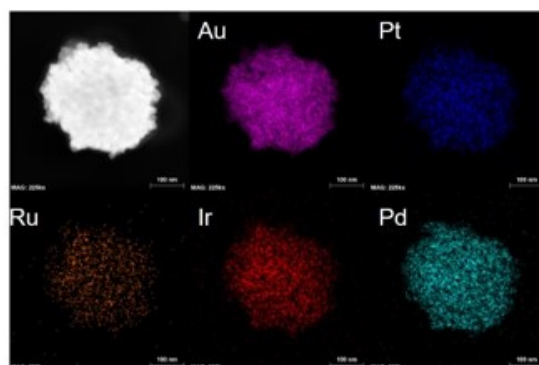

## HEA-90

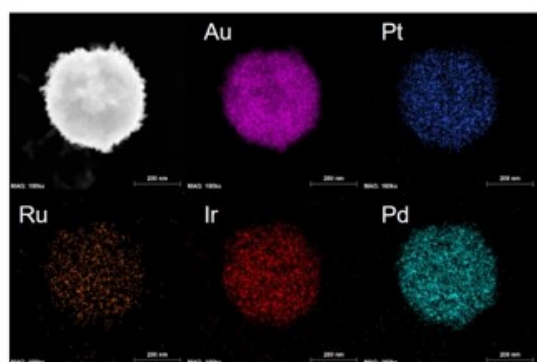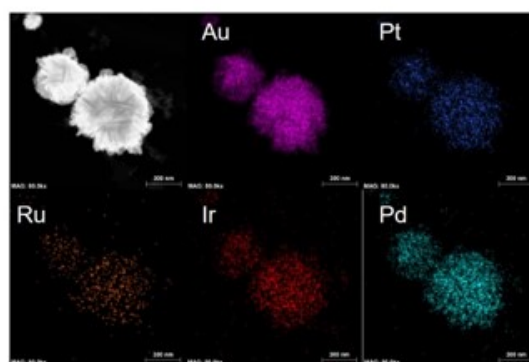

**Fig. S2** HAADF-STEM element mapping images of non-flowers (left) and flower (right) in HEA-30 and HEA-90 synthesized by CW CO<sub>2</sub> laser irradiation.

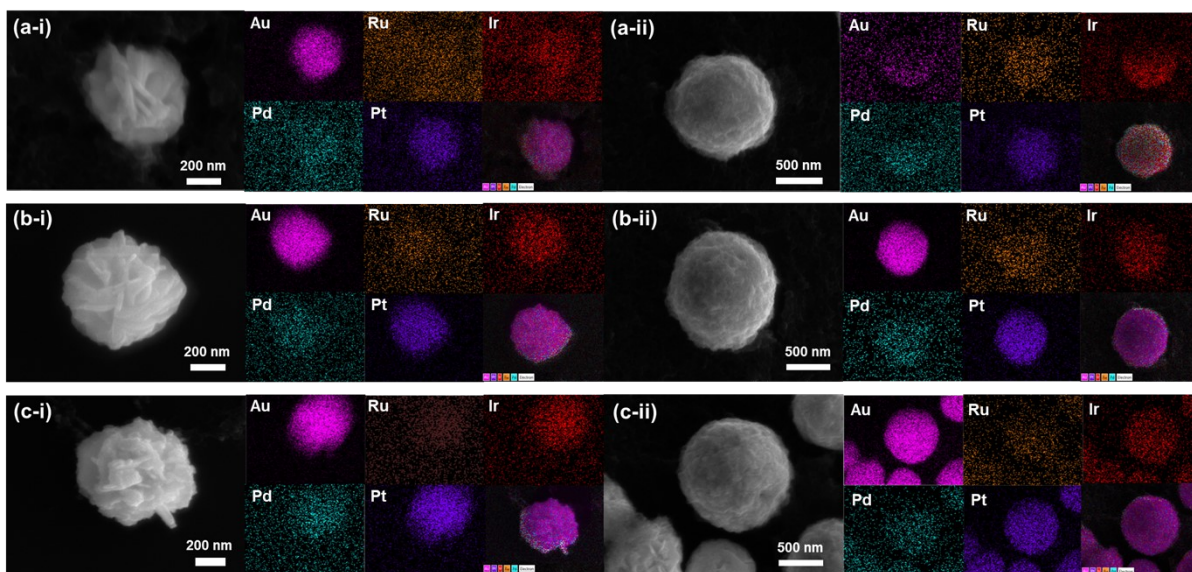

**Fig. S3** FE-SEM EDS elemental mapping images of flowers: (a-i) HEA-30, (b-i) HEA-60 and (c-i) HEA-90. FE-SEM EDS elemental mapping images of non-flowers: (a-ii) HEA-30, (b-ii) HEA-60 and (c-ii) HEA-90.

**Table S1.** ICP-OES results of HEA by CW CO<sub>2</sub> laser.

## Atomic%

|               | Pt   | Ir    | Au    | Ru    | Pd    |
|---------------|------|-------|-------|-------|-------|
| <b>HEA-30</b> | 5.51 | 16.62 | 33.36 | 22.31 | 22.19 |
| <b>HEA-60</b> | 4.68 | 16.85 | 34.01 | 30.84 | 13.63 |
| <b>HEA-90</b> | 6.87 | 15.19 | 34.26 | 33.41 | 10.27 |

## HEA-30

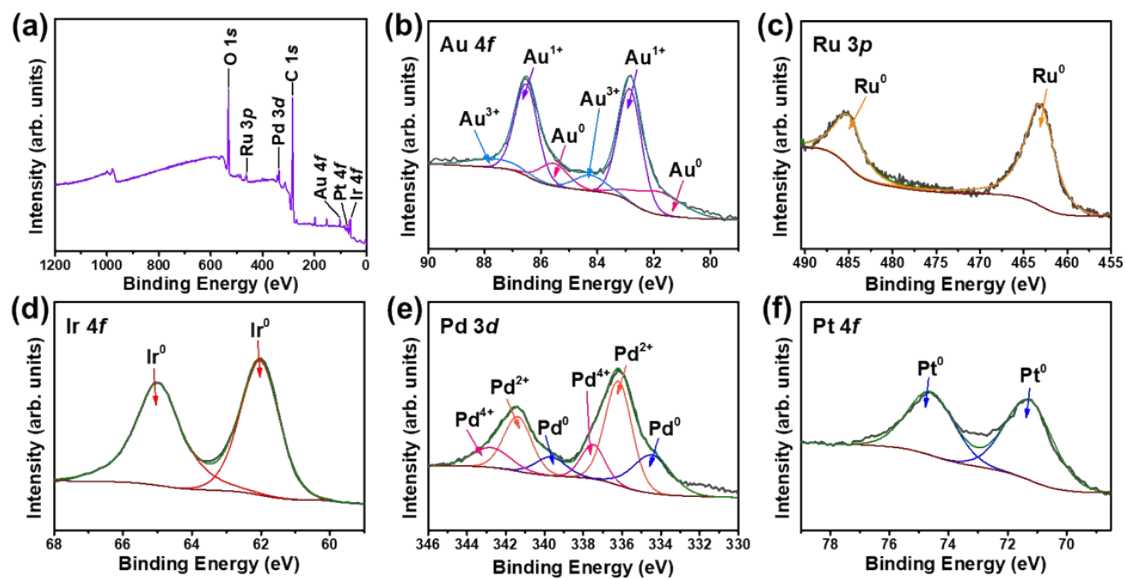

## HEA-90

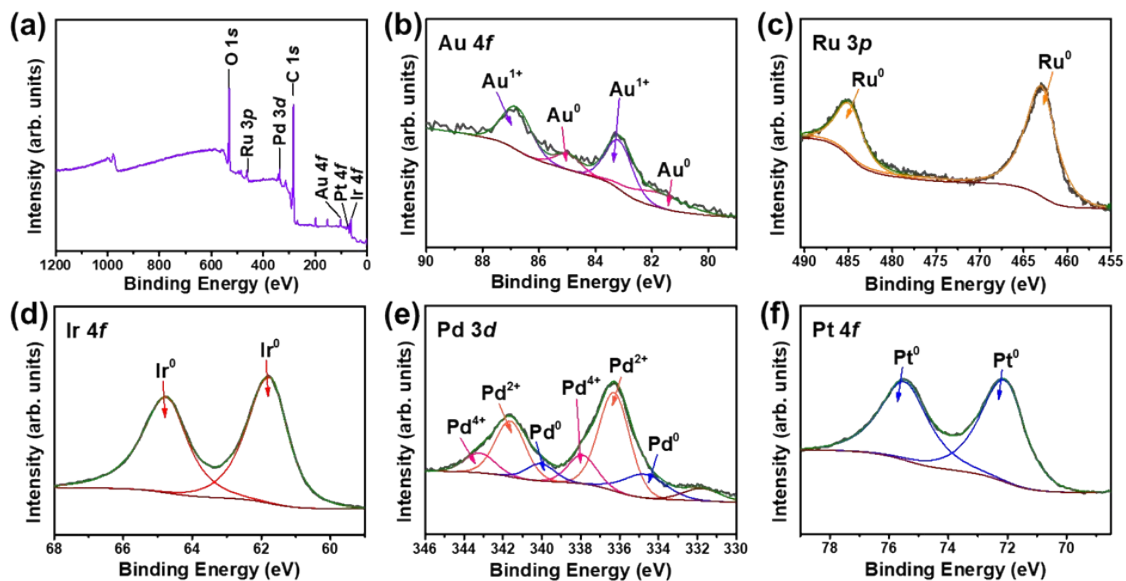

**Fig. S4** XPS spectra of HEA-30 and HEA-90; (a) XPS survey, (b) core-spectra Au 4f, (c) Ru 3p, (d) Ir 4f, (e) Pd 4f, and (f) Pt 4f

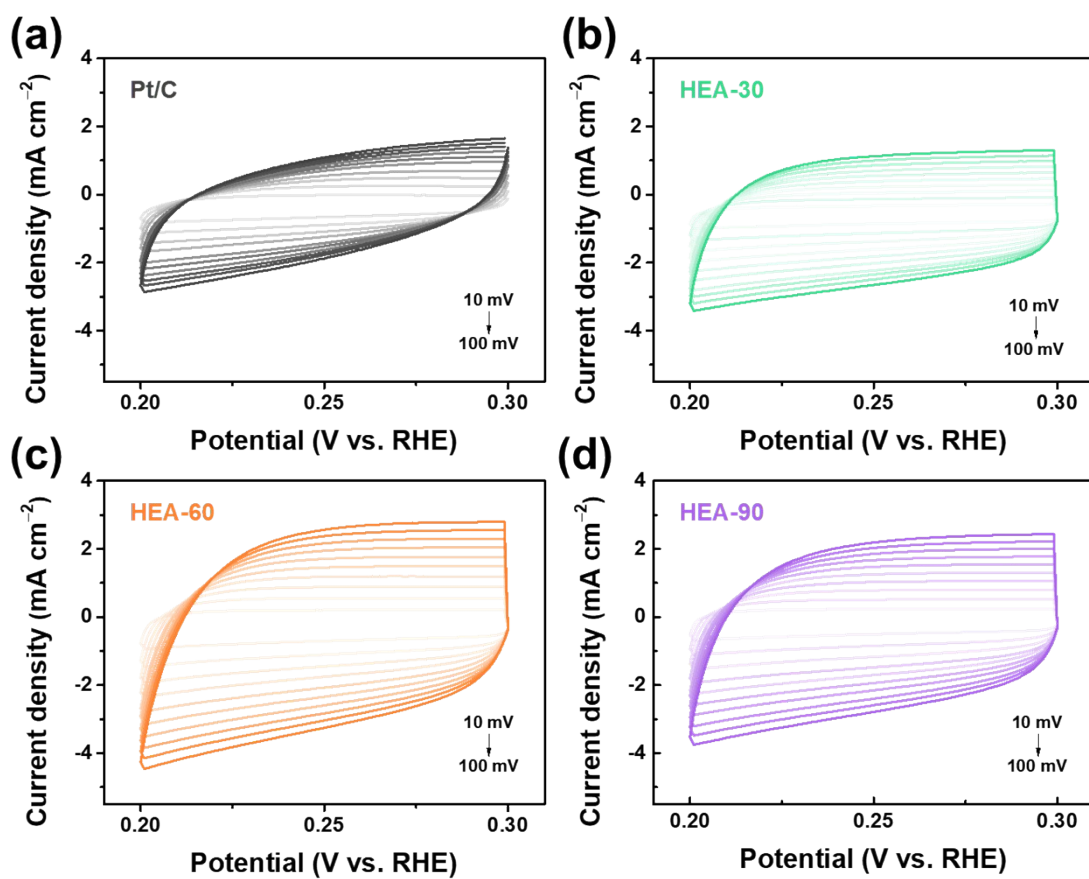

**Fig. S5** The calculated active site and CV curves at different scan rates of 10 to 100 mV s<sup>-1</sup> in 1.0 M KOH for HER. (a) Pt/C, (b) HEA-30, (c) HEA-60, and (d) HEA-90.

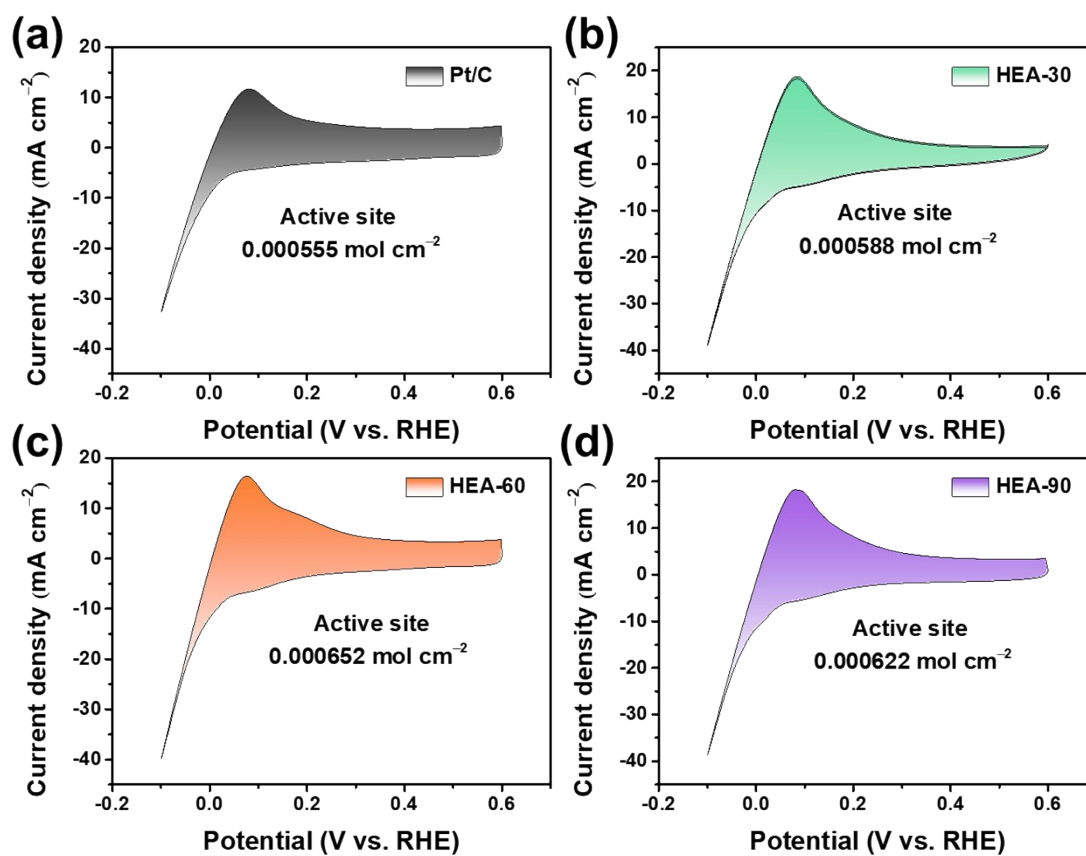

**Fig. S6** The CV profiles for the synthesized HEAs and commercial Pt/C, HEA-30, HEA-60, and HEA-90 samples attained in the potential range of -0.1 to 0.6 V vs. RHE in 1.0 M KOH at 50 mV/s.



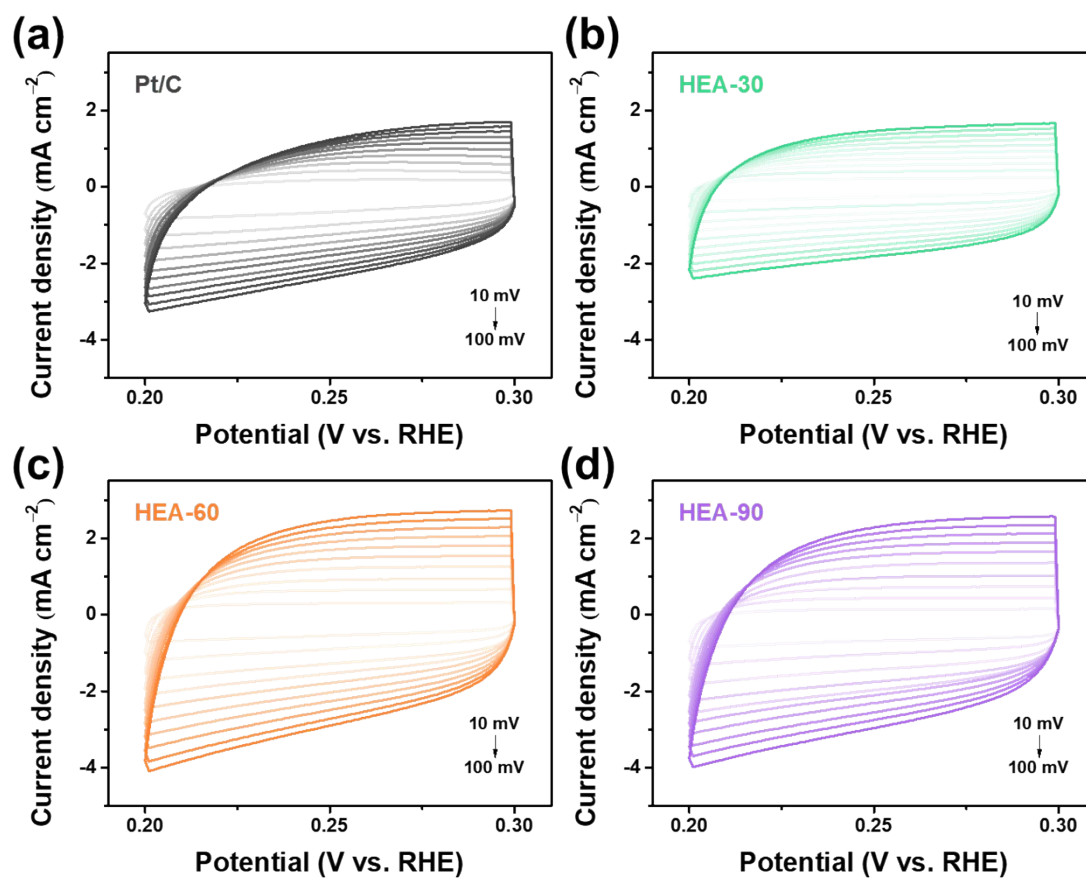

**Fig. S7** The CV curves at different scan rates of 10 to 100 mV s<sup>-1</sup> in 1.0 M KOH+0.5 M NaCl for HER; (a) Pt/C, (b) HEA-30, (c) HEA-60, and (d) HEA-90.

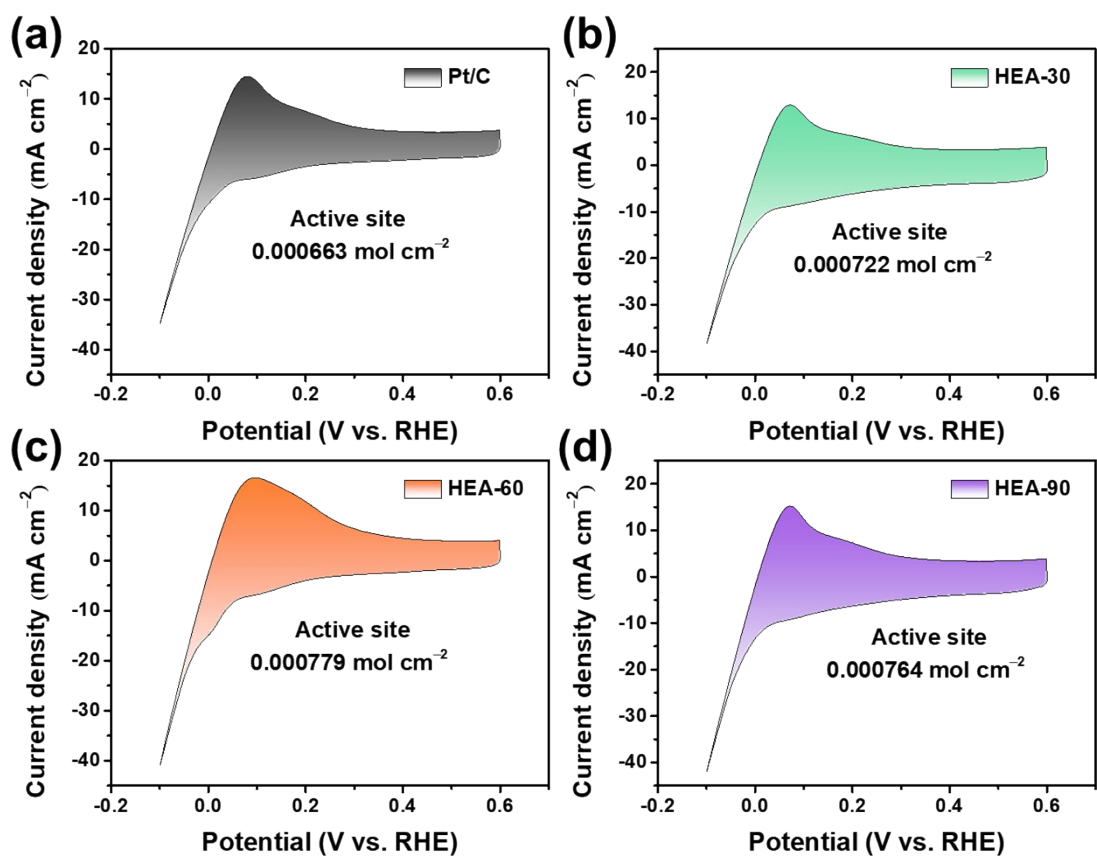

**Fig. S8** The calculated active sites using the CV profiles for the synthesized HEAs and commercial Pt/C, HEA-30, HEA-60, and HEA-90 samples in 1.0 M KOH + 0.5 M NaCl solution at 50 mV/s.

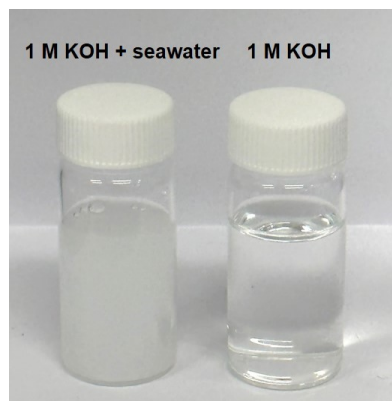

**Fig. S9** Seawater was collected from Namildae beach in Suncheon, South Korea.

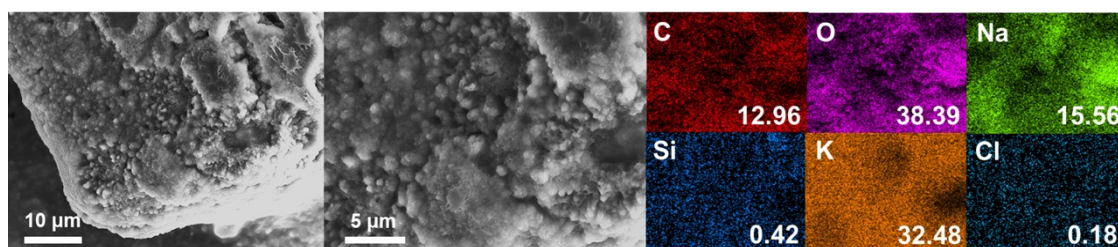

**Fig. S10** FE-SEM and EDS mapping of the HEA-60 electrode after HER test in alkaline seawater reveal the presence of Na, K, Cl, and Si from natural seawater, which cover the electrode surface and block the active sites.

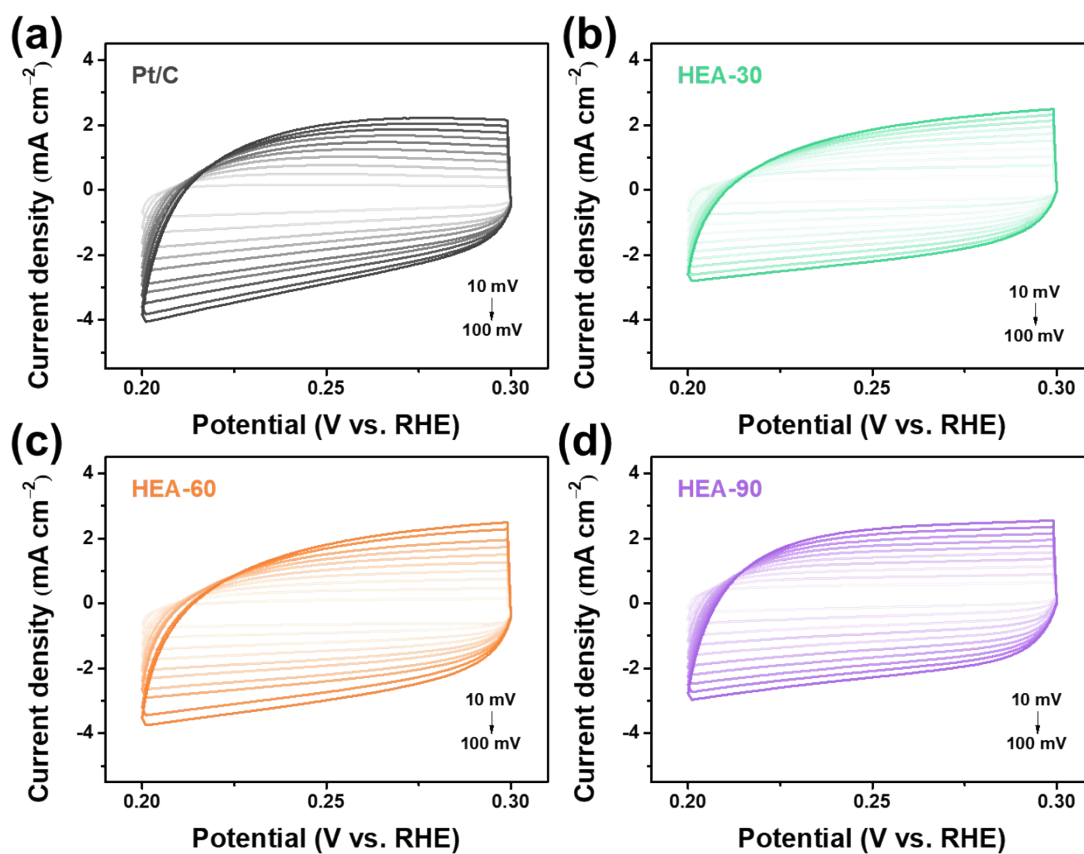

**Fig. S11** The CV curves at different scan rates of 10 to 100 mV s<sup>-1</sup> in 1.0 M KOH + natural seawater for HER; (a) Pt/C, (b) HEA-30, (c) HEA-60, and (d) HEA-90.

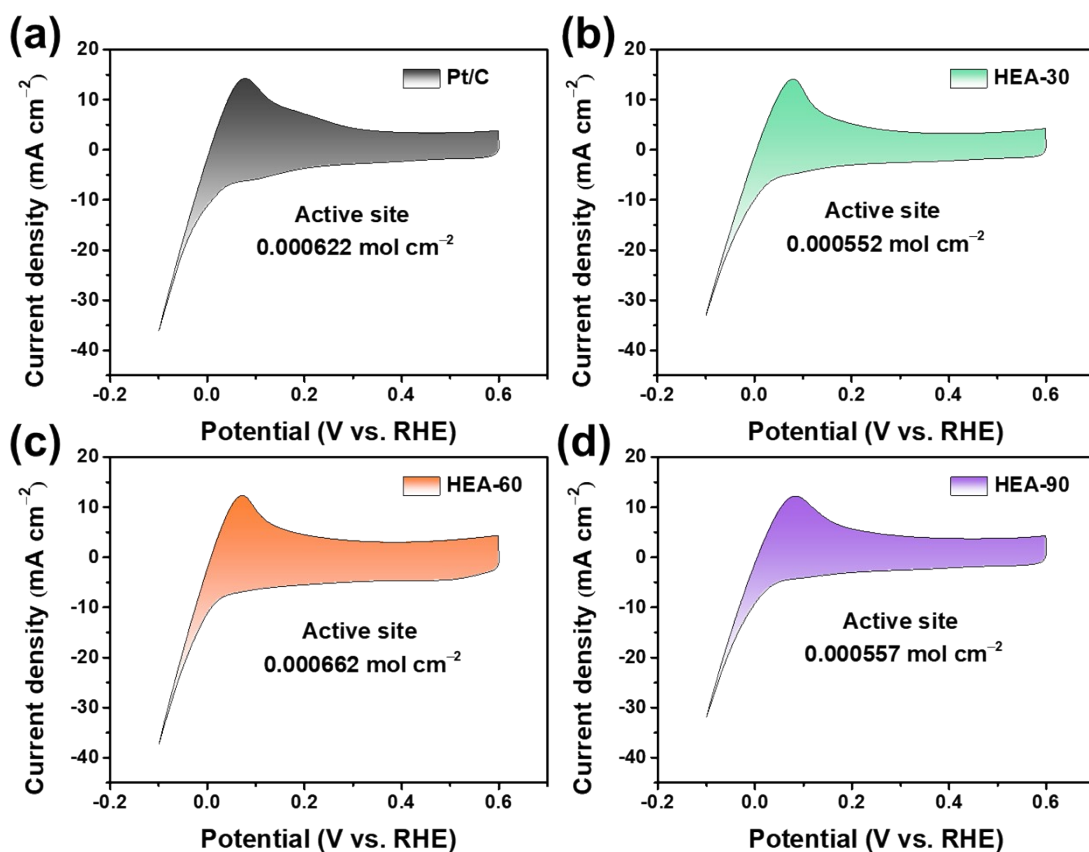

**Fig. S12** The calculated active sites using the CV profiles for the synthesized HEAs and commercial Pt/C, HEA-30, HEA-60, and HEA-90 samples in 1.0 M KOH in natural seawater solution at 50 mV/s.

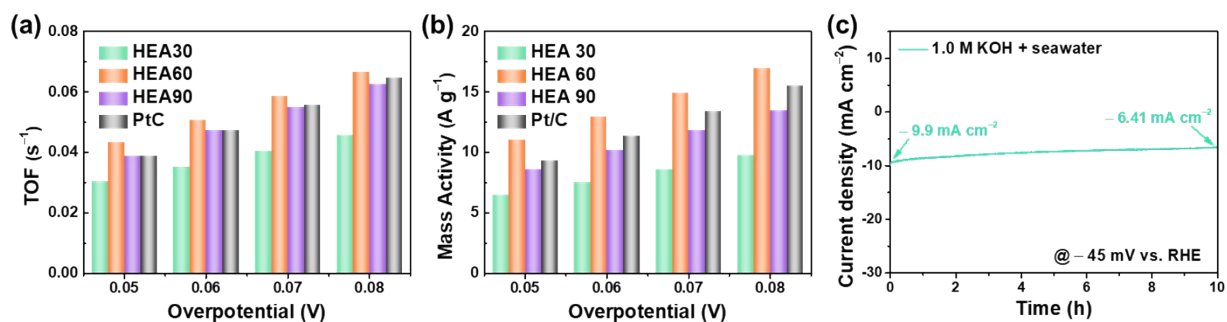

**Fig. 13** The HER performance of Pt/C, HEA-30, HEA-60, and HEA-90 in 1.0 M KOH in natural seawater; (a) TOF, (b) Mass activity, and (c) long-term stability.

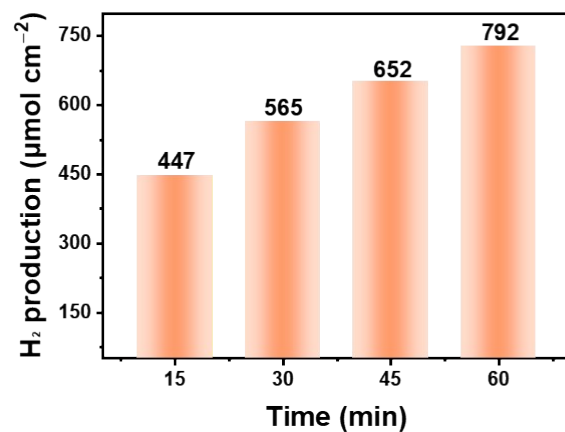

**Fig. S14** The measured amount of H<sub>2</sub> varies with reaction time for the fabricated IrO<sub>2</sub>(+)||HEA-60(-) alkaline seawater electrolyzer.

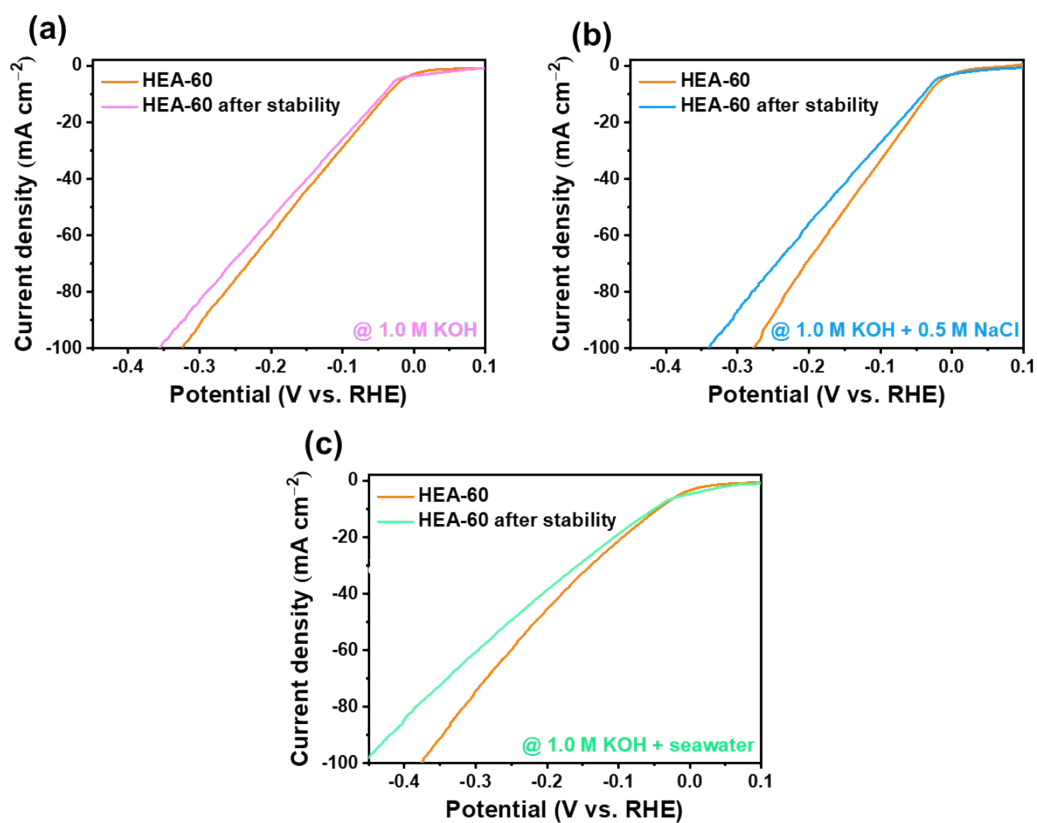

**Fig. S15** The LSV polarization curves of the before and after HER stability test in various electrolytes: (a) 1.0 M KOH, (b) 1.0 M KOH + 0.5 M NaCl and (c) 1.0 M KOH + Seawater.

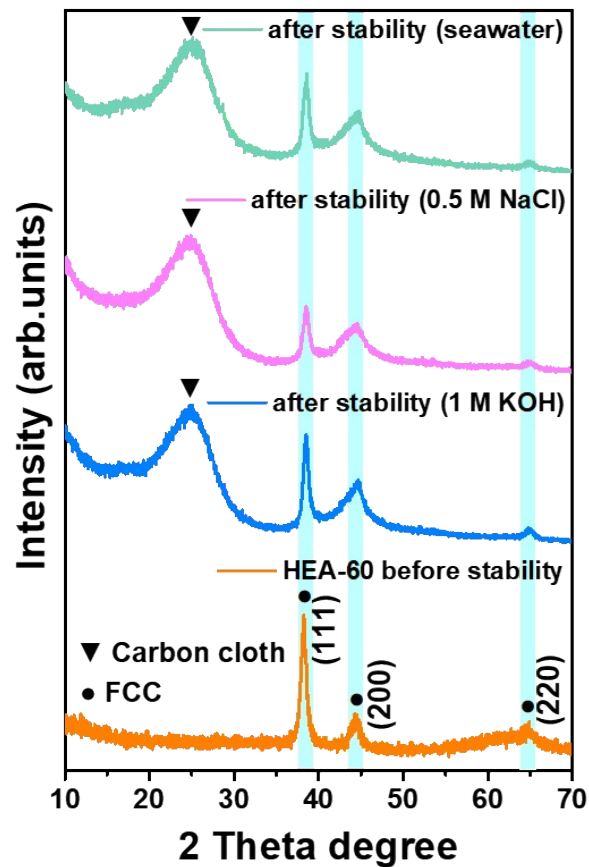

**Fig. S16** The XRD patterns of HEA-60 before and after HER stability test in various electrolytes.

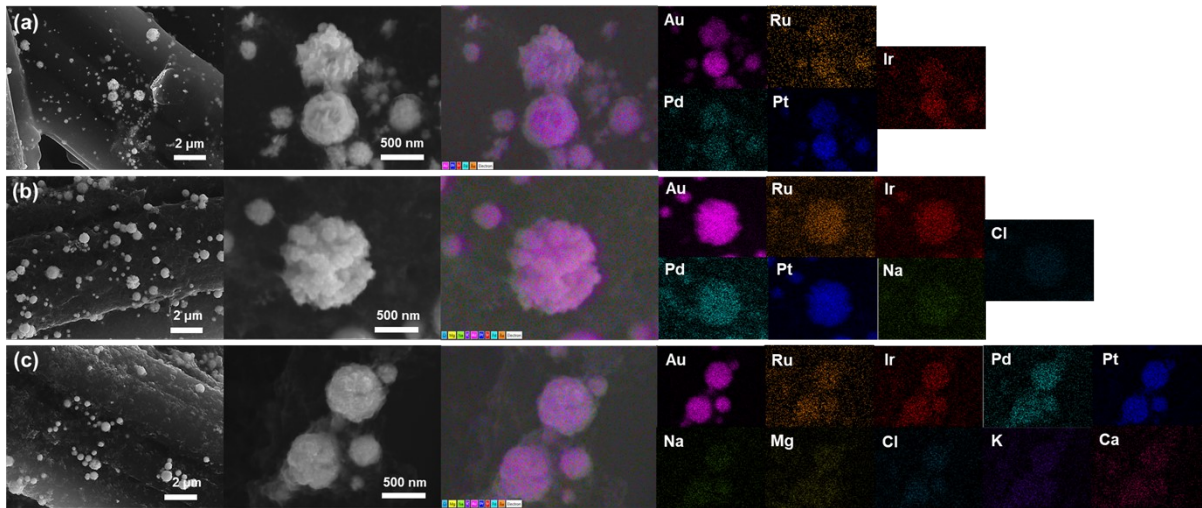

**Fig. S17** FE-SEM with EDS mapping images of the HEA-60 catalyst after HER stability test in various electrolytes: (a) 1.0 M KOH, (b) 1.0 M KOH + 0.5 M NaCl, and (c) 1.0 M KOH + Seawater.



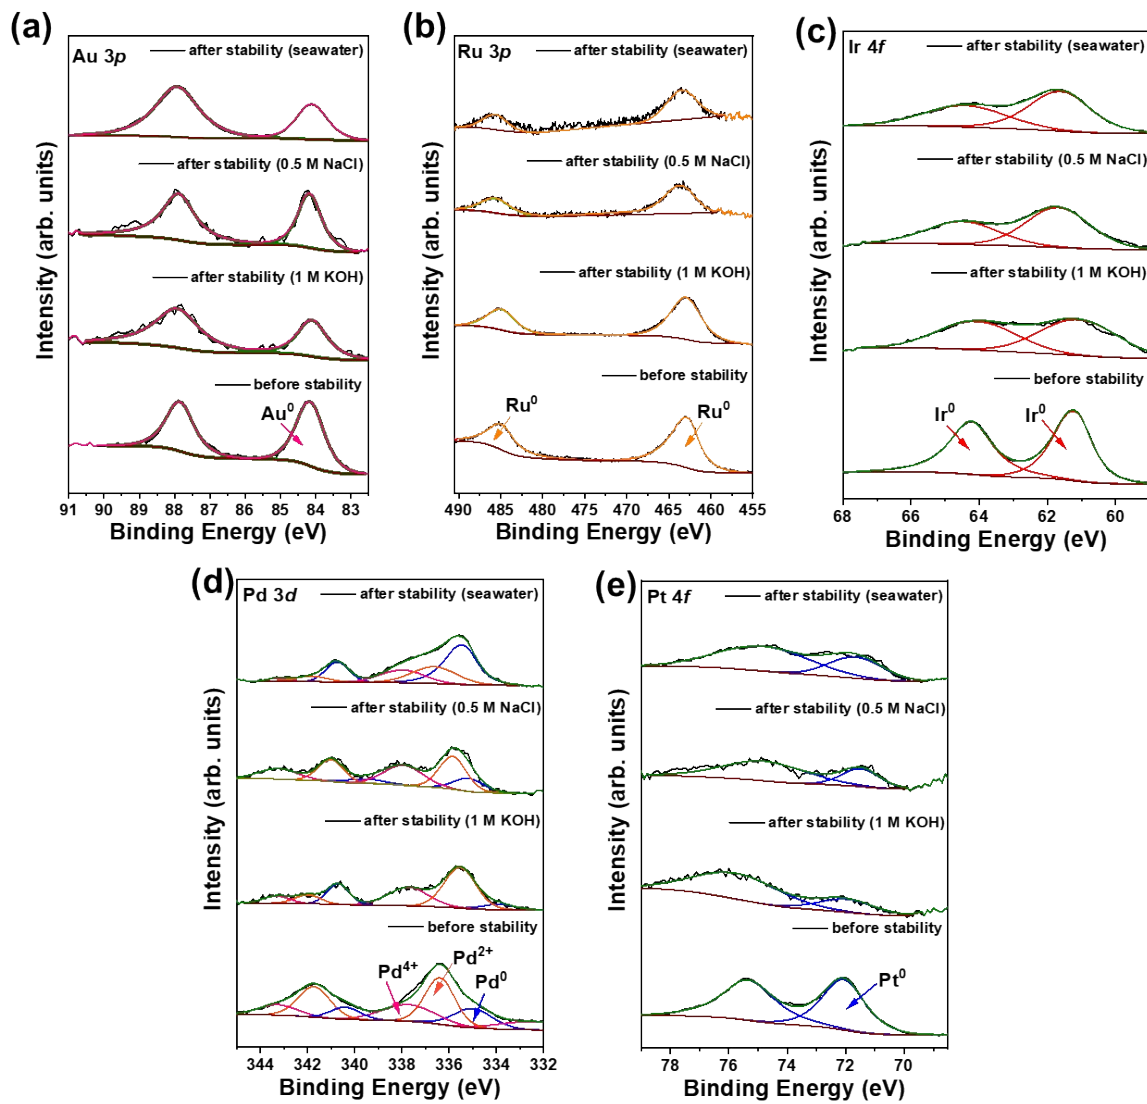

**Fig. S18** XPS spectra of the before and after HER stability test in various electrolytes: (a) Au 3p, (b) Ru 3p, (c) Ir 4f, (d) Pd 3d, and (e) Pt 4f.

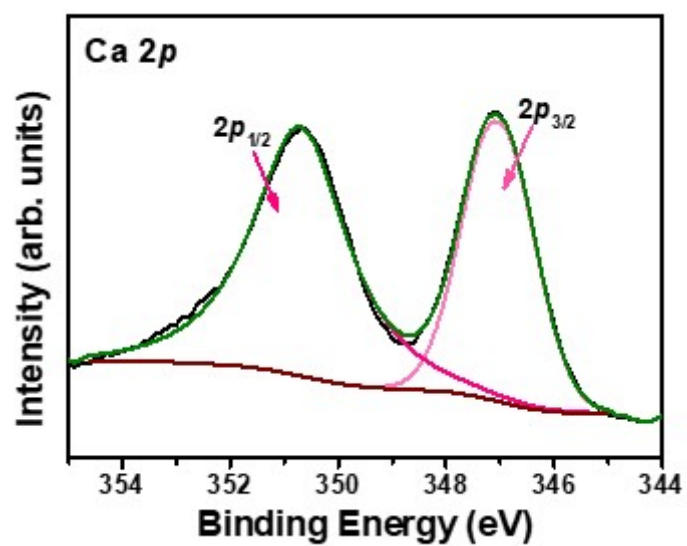

Fig. S19 XPS spectra of the Ca 2p after-stability test for alkaline seawater.

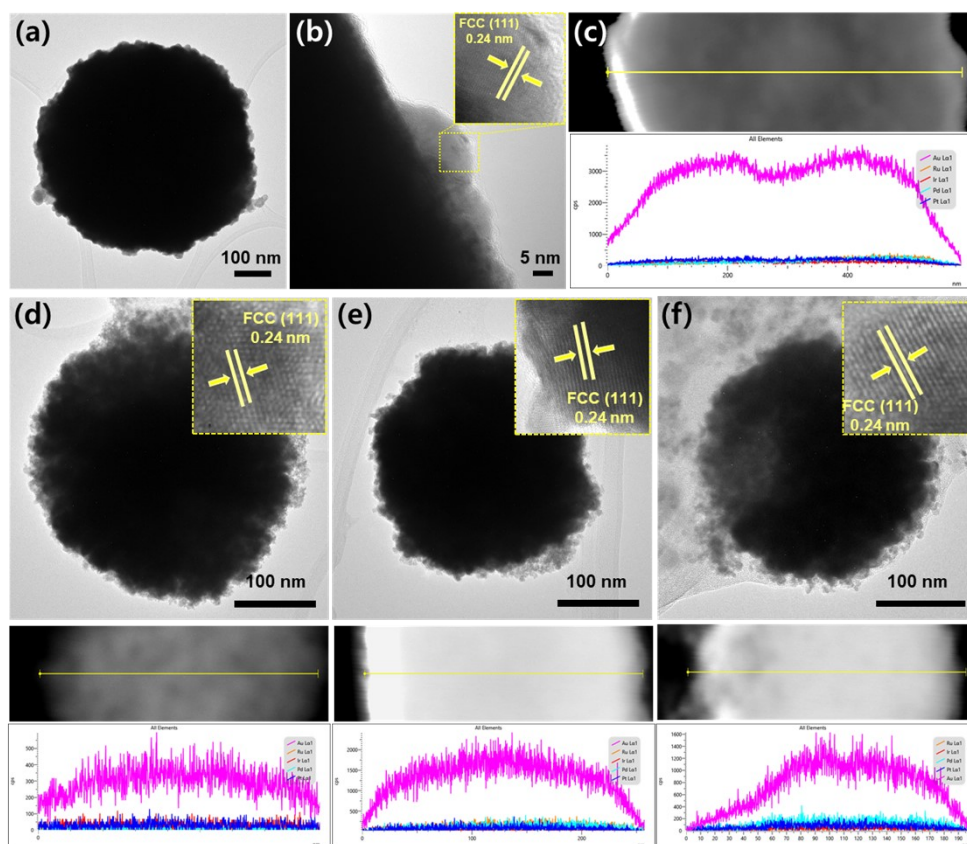

**Fig. S20** (a-b) HRTEM images with low and high magnification, and (c) line scan EDS spectrum of HEA-60 before stability test. HRTEM and line scan EDS spectra of HEA-60 after stability test in various electrolyte solutions: (d) 1.0 M KOH, (e) 1.0 M KOH + 0.5 M NaCl, and (e) 1.0 M KOH + seawater.
